# Supplementary material for: Genome-Wide Identification and Characterization of The MIOX Gene Family in Cotton
Source: Research Square preprint supplement (doi:10.21203/rs.3.rs-130287/v1), 2020-12-29
Supplement: Supplementary file 1 [file 7a2130122619239ed738d9b2.docx]

**Supplementary material**

**Genome-wide identification and characterization of the** **MIOX gene family in cotton**

Zhaoguo Li1,2†; Zhen Liu2†; Yangyang Wei2; Yuling Liu2; Linxue Xing2; Mengjie Liu2; Pengtao Li2; Quanwei Lu2* and Renhai Peng1,2*

1 Zhengzhou University, Zhengzhou, Henan 450001, China

2 Research Base, Anyang Institute of Technology, State Key Laboratory of Cotton Biology, Anyang, Henan 455000, China

† These authors contributed equally to this work.

* Co-corresponding authors: 13707667581@163.com; aydxprh@163.com

Additional file 1: Table S1. List of the identified MIOX genes in cotton. (XLSX 21kb)

Additional file 3: Table S2. Number of cis-elements present in the promoter regions of the MIOX genes. (XLSX 14kb)

**Supplementary Figures legend**

Additional file 2: Figure S1. Alignment of 85 MIOX protein sequence. Multiple sequence alignments were conducted using ClustalW. (PDF 36kb)

Additional file 4: Figure S2. Promoter analyses of MIOX genes. The promoter sequences (2 kb upstream of ATG) of the MIOX genes were analysed by PlantCARE.
