# Supplementary material for: Genome-Wide Identification and Characterization of The MIOX Gene Family in Cotton
Source: Research Square preprint supplement (doi:10.21203/rs.3.rs-130287/v1), 2020-12-29
Supplement: Supplementary file 2 [file 2cab55835f97bc06031ba788.xlsx]

## Sheet: Table. S1
Table S1. List of the identified MIOX genes in cotton
Gene Species and Numbers	Gene Name	Unique ID	pI	Mw（kDa）	Chr	From	To	mRNA Length	Protein Length（aa)	Group	Exon Number	Info Number
G. arboreum （6个）	GaMIOX01	evm.model.Ga01G2743	5.25	37019.8	Chr01	111880596	111884442	3846	316	A	11	10
	GaMIOX02	evm.model.Ga05G1408	5.41	35012.4	Chr05	12472135	12474690	2555	299	D	11	10
	GaMIOX03	evm.model.Ga06G0706	4.88	36245.9	Chr06	12074378	12076171	1793	311	C	10	9
	GaMIOX04	evm.model.Ga10G2412	5.04	35484.8	Chr10	121947346	121949792	2446	304	E	11	10
	GaMIOX05	evm.model.Ga12G0719	5.75	35225.7	Chr12	6753365	6754843	1478	303	B	8	7
	GaMIOX06	evm.model.Ga12G1286	5.37	38148.2	Chr12	16535979	16538598	2619	322	F	11	10
G. barbadense （12个）	GbMIOX01	Gbar_A03G000470.1	4.95	37067.6	Chr_A03	351339	355181	3842	315	A	11	10
	GbMIOX02	Gbar_A05G013100.1	5.14	35502	Chr_A05	12078304	12081470	3166	304	D	11	10
	GbMIOX03	Gbar_A06G007230.1	4.88	36665.3	Chr_A06	15963312	15965588	2276	315	C	10	9
	GbMIOX04	Gbar_A10G006770.1	5.04	35498.8	Chr_A10	7384405	7387573	3168	304	E	11	10
	GbMIOX05	Gbar_A12G016790.1	4.23	13057.6	Chr_A12	86595311	86596141	830	113	F	4	3
	GbMIOX06	Gbar_A12G022190.1	5.57	33694.9	Chr_A12	95750134	95751610	1476	290	B	9	8
	GbMIOX07	Gbar_D03G017980.1	5.14	30914.9	Chr_D03	50662304	50665151	2847	267	A	9	10
	GbMIOX08	Gbar_D05G013500.1	5.14	35379.8	Chr_D05	11441494	11444495	3001	304	D	11	10
	GbMIOX09	Gbar_D06G007500.1	4.88	36726.4	Chr_D06	11901483	11903741	2258	315	C	10	9
	GbMIOX10	Gbar_D10G006680.1	4.98	35513.9	Chr_D10	6441293	6444203	2910	304	E	11	10
	GbMIOX11	Gbar_D12G016860.1	4.23	11608	Chr_D12	46259454	46262139	2685	101	F	4	3
	GbMIOX12	Gbar_D12G022120.1	5.85	35184.7	Chr_D12	52806695	52810131	3436	303	B	8	8
G. darwinii （11个）	GdMIOX01	TYH23345.1	4.94	35081.5	Chr_A03	402392	404867	2475	301	A	11	10
	GdMIOX02	TYH16761.1	5.32	26891.5	Chr_A05	12382242	12385298	3056	229	D	11	10
	GdMIOX03	TYH12672.1	4.88	36277.9	Chr_A06	16354383	16356605	2222	311	C	10	9
	GdMIOX04	TYG97880.1	5.33	32048	Chr_A10	7409139	7410825	1686	272	E	10	9
	GdMIOX05	TYG91120.1	5.83	34067.6	Chr_A12	95347778	95349258	1480	294	B	8	7
	GdMIOX06	TYG77683.1	5.74	25357.9	Chr_D03	53756918	53758049	1131	217	A	5	4
	GdMIOX07	TYG68310.1	5.14	35379.8	Chr_D05	11308113	11311063	2950	304	D	11	10
	GdMIOX08	TYG64146.1	4.88	36726.4	Chr_D06	11948010	11950237	2227	315	C	10	9
	GdMIOX09	TYG49161.1	4.98	35513.9	Chr_D10	6548788	6551806	3018	304	F	11	10
	GdMIOX10	TYG41577.1	5.17	33579.9	Chr_D12	47978166	47985434	7268	285	E	10	9
	GdMIOX11	TYG42338.1	5.42	25410.9	Chr_D12	55103285	55118300	15015	217	B	5	4
G. herbaceum （6个）	GherMIOX01	Ghe02G00550	5.18	35135.7	Chr02	387446	390006	2560	302	A	11	10
	GherMIOX02	Ghe05G14330	4.97	35626.1	Chr05	13272547	13275164	2617	308	D	10	9
	GherMIOX03	Ghe06G08550	4.88	36305.9	Chr06	16751529	16753303	1774	311	C	10	9
	GherMIOX04	Ghe10G06570	4.95	41611.2	Chr10	7025010	7028602	3592	368	E	12	11
	GherMIOX05	Ghe12G20570	7.17	102942	Chr12	93442410	93460056	17646	896	F	22	21
	GherMIOX06	Ghe12G26740	5.79	34048.5	Chr12	103579453	103580933	1480	293	B	8	7
G. hirsutum （12个）	GhMIOX01	Ghicr24_A03G004500.1	4.97	33457.9	Chr_A03	379838	381931	2093	287	A	9	8
	GhMIOX02	Ghicr24_A05G137800.1	5.14	35502	Chr_A05	12954526	12957760	3234	305	D	11	10
	GhMIOX03	Ghicr24_A06G077100.1	4.88	36707.4	Chr_A06	16381541	16383776	2235	316	C	10	9
	GhMIOX04	Ghicr24_A10G066500.1	5.04	35471.8	Chr_A10	7621138	7624220	3082	305	E	11	10
	GhMIOX05	Ghicr24_A12G174300.1	5.3	21764	Chr_A12	86778789	86780721	1932	186	F	7	6
	GhMIOX06	Ghicr24_A12G229300.1	6.12	35893.6	Chr_A12	95858115	95863193	5078	307	B	9	8
	GhMIOX07	Ghicr24_D03G187000.1	5.41	35123.8	Chr_D03	52662904	52665413	2509	303	A	11	10
	GhMIOX08	Ghicr24_D05G131500.1	5.09	35422.9	Chr_D05	11219617	11227889	8272	305	D	11	10
	GhMIOX09	Ghicr24_D06G075600.1	4.89	36712.3	Chr_D06	11966273	11968255	1982	316	C	10	9
	GhMIOX10	Ghicr24_D10G064600.1	4.98	35513.9	Chr_D10	6776445	6779484	3039	305	E	11	10
	GhMIOX11	Ghicr24_D12G169400.1	5.29	32288.5	Chr_D12	47274228	47281486	7258	276	F	10	9
	GhMIOX12	Ghicr24_D12G225300.1	5.75	35228.8	Chr_D12	54435259	54437401	2142	304	B	8	7
G. kirkii （6个）	GkkMIOX01	Kirkii_Version3_Juiced.00g052280.m01.polypeptide	5.12	30894.8	Chr2_4	40899038	40900680	1642	266	A	8	7
	GkkMIOX02	Kirkii_Version3_Juiced.00g096920.m01.polypeptide	5.33	28958.9	Chr05	9576457	9577901	1444	252	D	8	7
	GkkMIOX03	Kirkii_Version3_Juiced.00g134420.m01.polypeptide	4.62	30789.5	Chr06	6960537	6961945	1408	267	C	8	7
	GkkMIOX04	Kirkii_Version3_Juiced.00g278160.m01.polypeptide	4.95	26839.3	Chr10	42356097	42357437	1340	229	E	8	7
	GkkMIOX05	Kirkii_Version3_Juiced.00g335360.m01.polypeptide	4.59	19752.1	Chr12	4868482	4869356	874	172	B	5	4
	GkkMIOX06	Kirkii_Version3_Juiced.00g341450.m01.polypeptide	4.78	21923.8	Chr12	9051595	9053125	1530	187	F	6	5
G. mustelinum （11个）	GmMIOX01	TYJ41221.1	5.11	35149.7	Chr_A03	413866	416625	2759	302	A	11	10
	GmMIOX02	TYJ34021.1	5.14	35502	Chr_A05	12782547	12785513	2966	304	D	11	10
	GmMIOX03	TYJ29548.1	4.88	36707.4	Chr_A06	16392003	16394258	2255	315	C	10	9
	GmMIOX04	TYJ13736.1	5.1	35512.9	Chr_A10	7735631	7738614	2983	304	E	11	10
	GmMIOX05	TYJ06299.1	5.83	34067.6	Chr_A12	99803331	99804947	1616	294	B	8	7
	GmMIOX06	TYI91460.1	5.27	26790.5	Chr_D03	56167580	56170132	2552	229	A	8	7
	GmMIOX07	TYI81269.1	5.14	35407.8	Chr_D05	11753720	11756706	2986	304	D	11	10
	GmMIOX08	TYI76516.1	6.65	23569	Chr_D06	12050081	12051995	1914	200	C	8	7
	GmMIOX09	TYI59975.1	5.15	35459.9	Chr_D10	6628680	6631751	3071	304	E	11	10
	GmMIOX10	TYI51481.1	5.15	32308.5	Chr_D12	50153455	50160620	7165	275	F	9	8
	GmMIOX11	TYI52323.1	5.42	25410.9	Chr_D12	57405537	57415000	9463	217	B	5	4
G. raimondii （6个）	GrMIOX01	XP_012472181.1	5.52	35099.8	Chr03	45452218	45455042	2824	302	A	11	10
	GrMIOX02	XP_012435726.1	5.34	36258.5	Chr08	44660745	44663649	2904	306	F	10	9
	GrMIOX03	XP_012439315.1	5.85	35282.8	Chr08	51266248	51268113	1865	303	B	8	7
	GrMIOX04	XP_012447306.1	5.14	35409.9	Chr09	10445882	10448797	2915	304	D	11	10
	GrMIOX05	XP_012452593.1	4.83	36687.2	Chr10	11587687	11589845	2158	315	C	10	9
	GrMIOX06	XP_012455200.1	5.15	35522.9	Chr11	6201589	6204503	2914	304	E	11	10
G. tomentosum （11个）	GtMIOX01	TYI34387.1	4.93	35096.4	Chr_A03	396483	398961	2478	301	A	11	10
	GtMIOX02	TYI26903.1	5.14	35502	Chr_A05	12518793	12521844	3051	304	D	11	10
	GtMIOX03	TYI22120.1	4.88	36647.3	Chr_A06	16897423	16899678	2255	315	C	10	9
	GtMIOX04	TYI05220.1	5.04	35498.8	Chr_A10	7293482	7295635	2153	304	E	11	10
	GtMIOX05	TYH97363.1	5.84	30223.4	Chr_A12	96155576	96158626	3050	262	B	8	7
	GtMIOX06	TYH81579.1	5.41	35123.8	Chr_D03	51841604	51844587	2983	302	A	11	10
	GtMIOX07	TYH70847.1	5.09	35474	Chr_D05	11376620	11384859	8239	304	D	11	10
	GtMIOX08	TYH65904.1	4.83	35986.5	Chr_D06	12368587	12370499	1912	309	C	10	9
	GtMIOX09	TYH48549.1	4.98	35513.9	Chr_D10	6417069	6420219	3150	304	E	11	10
	GtMIOX10	TYH39584.1	5.29	33607	Chr_D12	47400499	47407712	7213	285	F	10	9
	GtMIOX11	TYH40472.1	5.75	35228.8	Chr_D12	54527988	54530283	2295	303	B	8	7
