# Supplementary material for: Genome-Wide Identification and Characterization of The MIOX Gene Family in Cotton
Source: Research Square preprint supplement (doi:10.21203/rs.3.rs-130287/v1), 2020-12-29
Supplement: Supplementary file 4 [file 1caa242f7ebbdc24e6b8d64e.xlsx]

## Sheet: Sheet1
Table S2. Number of cis-elements present in the promoter regions of the MIOX genes
	MeJA-responsive	MeJA-responsive	low-temperature responsive	drought-responsive	salicylic acid responsive	abscisic acid responsive	gibberellin responsive	gibberellin responsive	gibberellin responsive	defense and stress responsive	auxin responsive
	CGTCA-motif	TGACG-motif	LTR	MBS	TCA-element	ABRE	P-box	TATC-box	GARE-motif	TC-rich repeats	Auxins	light responsive
GaMIOX01	1	1	1	0	1	3	1	0	0	0	0	5
GaMIOX02	2	2	0	1	1	0	0	1	0	2	0	3
GaMIOX03	4	4	2	2	1	4	1	1	0	1	0	5
GaMIOX04	2	2	0	0	0	3	0	0	0	1	0	3
GaMIOX05	0	0	0	0	0	1	1	0	0	1	0	3
GaMIOX06	1	1	0	1	0	2	0	2	0	0	0	6
GbMIOX01	0	0	1	0	1	2	1	0	0	0	0	3
GbMIOX02	2	2	0	1	1	0	0	1	0	2	0	3
GbMIOX03	4	4	2	2	1	4	1	1	0	1	1	4
GbMIOX04	2	2	0	0	0	3	0	0	0	1	0	3
GbMIOX05	1	1	0	0	0	2	2	2	0	0	0	9
GbMIOX06	0	0	0	0	1	1	1	0	0	1	0	3
GbMIOX07	1	1	0	0	1	3	0	0	0	1	0	3
GbMIOX08	2	2	0	1	1	0	0	2	0	1	0	2
GbMIOX09	2	2	1	2	0	6	1	0	0	2	2	7
GbMIOX10	3	3	0	0	0	3	0	0	0	1	0	4
GbMIOX11	3	3	0	0	0	2	0	0	0	0	0	3
GbMIOX12	1	1	1	0	0	0	1	0	0	1	1	3
GdMIOX01	0	0	0	0	2	1	1	0	0	0	1	6
GdMIOX02	2	2	0	1	1	0	0	1	0	2	0	3
GdMIOX03	4	4	2	2	1	4	1	1	0	1	1	4
GdMIOX04	2	2	1	0	0	3	0	0	0	1	0	3
GdMIOX05	0	0	0	0	1	1	1	0	0	1	0	3
GdMIOX06	1	1	0	0	1	3	0	0	0	0	0	6
GdMIOX07	2	2	0	1	1	0	0	2	0	1	1	2
GdMIOX08	2	2	1	2	0	6	1	0	0	2	2	7
GdMIOX09	3	3	0	0	0	3	0	0	0	1	0	4
GdMIOX10	1	1	0	1	0	2	2	2	0	0	0	8
GdMIOX11	2	2	1	0	0	0	1	0	0	1	0	4
GherMIOX01	0	0	0	0	2	1	1	0	0	0	1	7
GherMIOX02	2	2	0	1	1	0	0	1	0	2	0	3
GherMIOX03	4	4	2	2	1	4	0	1	0	1	0	5
GherMIOX04	2	2	0	0	0	3	0	0	0	1	0	3
GherMIOX05	5	5	0	0	0	7	0	1	0	0	3	12
GherMIOX06	0	0	0	0	0	1	1	0	0	1	0	4
GhMIOX01	0	0	0	0	1	1	0	0	0	0	1	4
GhMIOX02	2	2	0	1	1	0	0	1	0	2	0	3
GhMIOX03	4	4	2	2	1	4	1	1	0	1	1	4
GhMIOX04	2	2	0	0	0	3	0	0	0	1	0	3
GhMIOX05	1	1	0	1	0	2	3	0	2	0	0	10
GhMIOX06	0	0	1	2	0	3	0	1	0	0	0	4
GhMIOX07	1	1	0	0	1	3	0	0	0	1	0	3
GhMIOX08	2	2	0	1	1	0	0	2	0	1	0	3
GhMIOX09	2	2	1	2	0	6	1	1	0	1	2	7
GhMIOX10	3	3	0	0	0	3	0	0	0	1	0	4
GhMIOX11	1	1	0	1	0	2	1	2	0	0	0	8
GhMIOX12	1	1	1	0	0	0	1	0	0	1	1	3
GmMIOX01	0	0	0	0	2	1	1	0	0	0	1	6
GmMIOX02	1	2	0	1	1	0	0	1	0	2	0	3
GmMIOX03	4	4	1	2	1	4	1	1	0	1	1	4
GmMIOX04	2	2	0	0	0	3	0	0	0	1	0	3
GmMIOX05	0	0	0	0	0	1	1	0	0	1	0	3
GmMIOX06	1	1	0	0	1	3	0	0	0	0	0	6
GmMIOX07	2	2	2	1	1	0	0	2	0	1	0	3
GmMIOX08	3	3	1	2	0	6	1	1	0	1	2	8
GmMIOX09	3	3	0	0	0	3	0	0	0	1	0	4
GmMIOX10	1	1	0	1	0	2	1	2	0	0	0	8
GmMIOX11	2	2	1	0	0	0	1	0	0	1	0	4
GrMIOX01	2	2	0	0	1	3	0	0	0	1	0	3
GrMIOX02	1	1	1	1	0	2	1	2	0	0	0	9
GrMIOX03	1	1	1	0	0	0	1	0	0	0	2	5
GrMIOX04	2	2	0	1	1	0	0	1	0	1	0	2
GrMIOX05	2	2	1	2	0	6	1	1	0	1	4	8
GrMIOX06	2	2	0	0	0	1	0	0	0	1	1	2
GtMIOX01	0	0	0	0	2	1	1	0	0	0	1	6
GtMIOX02	2	2	0	1	1	0	0	1	0	2	0	3
GtMIOX03	4	4	2	2	1	4	1	1	0	1	0	4
GtMIOX04	2	2	0	0	0	3	0	0	0	1	0	3
GtMIOX05	0	0	0	0	0	1	1	0	0	1	0	3
GtMIOX06	1	1	0	0	1	3	0	0	0	1	0	3
GtMIOX07	2	2	0	1	1	0	0	1	0	1	0	3
GtMIOX08	2	2	1	2	0	6	1	1	0	1	2	7
GtMIOX09	3	3	0	0	0	3	0	0	0	1	0	4
GtMIOX10	1	1	0	1	0	2	1	2	0	0	0	8
GtMIOX11	1	1	1	0	0	1	1	0	0	1	1	3
